# Supplementary material for: Inhibition of Bacterial and Fungal Biofilm Formation by 675 Extracts from Microalgae and Cyanobacteria
Source: MDPI journal article supplement (doi:10.3390/antibiotics8020077), 2019-06-12
Supplement: s1 [file s1]

## Supplementary Materials

**Table S1.** Three methods of extraction analyzed by one-way ANOVA. DF: degrees of freedom; P value:  $p < 0.05$  were considered statistically significant.

| Source of variance | Sum of squares | DF   | Mean of squares | P value |
|--------------------|----------------|------|-----------------|---------|
| Treatment          | 0.3933         | 2    | 0.1966          | 0.3272  |
| Residual           | 1065           | 6051 | 0.1760          |         |
| Total              | 1065           | 6053 |                 |         |

**Table S2.** Results of Gram-negative strains comparing with treatment (phylum) and method of extraction (solvent). Two-way ANOVA followed by *post hoc* Tukey's test were used. MD: mean difference; SD: standard error of the difference; CI of diff: confidence interval of difference 95%; P value:  $p < 0.05$  were considered statistically significant.

| <b><i>Escherichia coli</i></b>             |          |         |                    |                      |
|--------------------------------------------|----------|---------|--------------------|----------------------|
|                                            | MD       | SD      | CI of diff.        | P value              |
| <i>Charophyta</i> vs <i>Chlorophyta</i>    | -0.1043  | 0.0192  | -0.1495 to -0.0591 | <0.0001 <sup>3</sup> |
| <i>Charophyta</i> vs <i>Cyanobacteria</i>  | -0.0641  | 0.0194  | -0.1096 to -0.0186 | 0.0028 <sup>1</sup>  |
| <i>Chlorophyta</i> vs <i>Cyanobacteria</i> | 0.0402   | 0.0118  | 0.0124 to 0.0680   | 0.0021 <sup>1</sup>  |
| <b><i>Klebsiella pneumoniae</i></b>        |          |         |                    |                      |
|                                            | MD       | SD      | CI of diff.        | P value              |
| <i>Charophyta</i> vs <i>Chlorophyta</i>    | -0.0433  | 0.0231  | -0.0976 to 0.0110  | 0.1473 <sup>4</sup>  |
| <i>Charophyta</i> vs <i>Cyanobacteria</i>  | 0.0010   | 0.0232  | -0.0536 to 0.0554  | 0.9992 <sup>4</sup>  |
| <i>Chlorophyta</i> vs <i>Cyanobacteria</i> | 0.0442   | 0.0141  | 0.0112 to 0.0772   | 0.0050 <sup>1</sup>  |
| <b><i>Enterobacter cloacae</i></b>         |          |         |                    |                      |
|                                            | MD       | SD      | CI of diff.        | P value              |
| <i>Charophyta</i> vs <i>Chlorophyta</i>    | -0.01127 | 0.02871 | -0.0787 to 0.0562  | 0.9186 <sup>4</sup>  |
| <i>Charophyta</i> vs <i>Cyanobacteria</i>  | 0.02747  | 0.02880 | -0.0402 to 0.0951  | 0.6065 <sup>4</sup>  |
| <i>Chlorophyta</i> vs <i>Cyanobacteria</i> | 0.03873  | 0.01746 | -0.0023 to 0.0798  | 0.0690 <sup>4</sup>  |
| <b><i>Pseudomonas aeruginosa</i></b>       |          |         |                    |                      |
|                                            | MD       | SD      | CI of diff.        | P value              |
| <i>Charophyta</i> vs <i>Chlorophyta</i>    | -0.08730 | 0.02849 | -0.1542 to -0.0204 | 0.0064 <sup>1</sup>  |
| <i>Charophyta</i> vs <i>Cyanobacteria</i>  | -0.05450 | 0.02866 | -0.1218 to 0.0129  | 0.1391 <sup>4</sup>  |
| <i>Chlorophyta</i> vs <i>Cyanobacteria</i> | 0.03280  | 0.01746 | -0.0082 to 0.0739  | 0.1460 <sup>4</sup>  |

Tukey's *post hoc* test significance; <sup>1</sup> $p < 0.01$ ; <sup>2</sup> $p < 0.001$ ; <sup>3</sup> $p < 0.0001$ ; <sup>4</sup>ns.

**Table S3.** Results of Gram-positive strains comparing with treatment (phylum) and method of extraction (solvent). Two-way ANOVA followed by *post hoc* Tukey's test were used. MD: mean difference; SD: standard error of the difference; CI of diff: confidence interval of difference 95%; P value:  $p < 0.05$  were considered statistically significant.

| <i>Staphylococcus aureus</i>               |          |         |                    |                      |
|--------------------------------------------|----------|---------|--------------------|----------------------|
|                                            | MD       | SD      | CI of diff.        | P value              |
| <i>Charophyta</i> vs <i>Chlorophyta</i>    | -0.3021  | 0.04860 | -0.4163 to -0.1879 | <0.0001 <sup>3</sup> |
| <i>Charophyta</i> vs <i>Cyanobacteria</i>  | -0.05780 | 0.04875 | -0.1724 to 0.0568  | 0.4622 <sup>4</sup>  |
| <i>Chlorophyta</i> vs <i>Cyanobacteria</i> | 0.2443   | 0.02956 | 0.1748 to 0.3137   | <0.0001 <sup>3</sup> |
| <i>Staphylococcus epidermidis</i>          |          |         |                    |                      |
|                                            | MD       | SD      | CI of diff.        | P value              |
| <i>Charophyta</i> vs <i>Chlorophyta</i>    | -0.2050  | 0.06332 | -0.3538 to -0.0562 | 0.0036 <sup>1</sup>  |
| <i>Charophyta</i> vs <i>Cyanobacteria</i>  | -0.08300 | 0.06351 | -0.2322 to 0.0662  | 0.3919 <sup>4</sup>  |
| <i>Chlorophyta</i> vs <i>Cyanobacteria</i> | 0.1220   | 0.03851 | 0.03151 to 0.2125  | 0.0046 <sup>1</sup>  |
| <i>Staphylococcus hominis</i>              |          |         |                    |                      |
|                                            | MD       | SD      | CI of diff.        | P value              |
| <i>Charophyta</i> vs <i>Chlorophyta</i>    | -0.1177  | 0.05585 | -0.2489 to 0.0135  | 0.0892 <sup>4</sup>  |
| <i>Charophyta</i> vs <i>Cyanobacteria</i>  | 0.2093   | 0.05602 | 0.0777 to 0.3410   | 0.0006 <sup>2</sup>  |
| <i>Chlorophyta</i> vs <i>Cyanobacteria</i> | 0.3270   | 0.03397 | 0.2472 to 0.4068   | <0.0001 <sup>3</sup> |

Tukey's *post hoc* test significance; <sup>1</sup> $p < 0.01$ ; <sup>2</sup> $p < 0.001$ ; <sup>3</sup> $p < 0.0001$ ; <sup>4</sup>ns.

**Table A4.** Results of *Candida* spp. comparing with treatment (phylum) and method of extraction (solvent). Two-way ANOVA followed by *post hoc* Tukey's test were used. MD: mean difference; SD: standard error of the difference; CI of diff: confidence interval of difference 95%; P value:  $p < 0.05$  were considered statistically significant.

| <i>Candida albicans</i>                    |         |        |                    |                      |
|--------------------------------------------|---------|--------|--------------------|----------------------|
|                                            | MD      | SD     | CI of diff.        | P value              |
| <i>Charophyta</i> vs <i>Chlorophyta</i>    | 0.0049  | 0.0226 | -0.04818 to 0.0580 | 0.9744 <sup>2</sup>  |
| <i>Charophyta</i> vs <i>Cyanobacteria</i>  | -0.0266 | 0.0227 | -0.07981 to 0.0267 | 0.4701 <sup>2</sup>  |
| <i>Chlorophyta</i> vs <i>Cyanobacteria</i> | -0.0315 | 0.0135 | -0.06375 to 0.0008 | 0.0579 <sup>2</sup>  |
| <i>Candida parapsilopsis</i>               |         |        |                    |                      |
|                                            | MD      | SD     | CI of diff.        | P value              |
| <i>Charophyta</i> vs <i>Chlorophyta</i>    | -0.136  | 0.0281 | -0.2017 to -0.0698 | <0.0001 <sup>1</sup> |
| <i>Charophyta</i> vs <i>Cyanobacteria</i>  | -0.0603 | 0.0282 | -0.1265 to 0.0058  | 0.0824 <sup>2</sup>  |
| <i>Chlorophyta</i> vs <i>Cyanobacteria</i> | 0.0754  | 0.0171 | 0.03524 to 0.1155  | <0.0001 <sup>1</sup> |

Tukey's *post hoc* test significance; <sup>1</sup> $p < 0.0001$ ; <sup>2</sup>ns.
